# Supplementary material for: The Prevalence of Hypogonadism and the Effectiveness of Androgen Administration on Body Composition in HIV-Infected Men: A Meta-Analysis
Source: MDPI journal article supplement (doi:10.3390/cells10082067), 2021-08-12
Supplement: s1 [file s1]

| Study                      | Selection bias | Study design                     | Data collection | Global rating |
|----------------------------|----------------|----------------------------------|-----------------|---------------|
| Dobs et al, 1988           | Weak           | Observational<br>Longitudinal    | Moderate        | Moderate      |
| Croxson et al, 1989        | Strong         | Observational<br>Case-control    | Moderate        | Low           |
| Raffi et al, 1991          | Weak           | Observational<br>Cross-sectional | Moderate        | Moderate      |
| Laudat et al, 1995         | Strong         | Observational<br>Cross-sectional | Moderate        | Moderate      |
| Dobs et al, 1996           | Weak           | Observational<br>Case-control    | Moderate        | Moderate      |
| Grinspoon et al, 1996      | Strong         | Observational<br>Cross-sectional | Strong          | Moderate      |
| Schürmeyer et al, 1997     | Weak           | Observational<br>Longitudinal    | Moderate        | Moderate      |
| Bhasin et al, 1998         | Weak           | RCT                              | Strong          | High          |
| Arver et al, 1999          | Moderate       | Observational<br>Case-control    | Strong          | Moderate      |
| Dobs et al, 1999           | Weak           | RCT                              | Strong          | High          |
| Kopicko et al, 1999        | Weak           | Observational<br>Cross-sectional | Moderate        | Moderate      |
| Salehian et al, 1999       | Strong         | Observational<br>Longitudinal    | Moderate        | Low           |
| Rietschel et al, 2000      | Strong         | Observational<br>Cross-sectional | Moderate        | Low           |
| Rabkin et al, 2000         | Weak           | RCT                              | Moderate        | Moderate      |
| Grinspoon et al, 2000      | Weak           | RCT                              | Moderate        | Moderate      |
| Hadigan et al, 2000        | Weak           | RCT                              | Strong          | High          |
| Biglia et al, 2004         | Strong         | Observational<br>Case-control    | Moderate        | Low           |
| Andersen et al, 2007       | Strong         | Observational<br>Cross-sectional | Moderate        | Low           |
| Crum-Cianflone et al, 2007 | Weak           | Observational<br>Cross-sectional | Moderate        | Moderate      |
| Mulligan et al, 2007       | Weak           | RCT                              | Strong          | High          |
| Knapp et al, 2008          | Weak           | RCT                              | Moderate        | Moderate      |
| Teichmann et al, 2008      | Moderate       | Observational<br>Cross-sectional | Moderate        | Moderate      |
| Moreno-Pérez et al, 2010   | Weak           | Observational<br>Cross-sectional | Moderate        | Moderate      |
| Meena et al, 2010          | Weak           | Observational<br>Cross-sectional | Moderate        | Moderate      |
| Rochira et al, 2011        | Weak           | Observational<br>Cross-sectional | Strong          | Moderate      |
| Pepe et al, 2012           | Weak           | Observational<br>Cross-sectional | Strong          | Moderate      |

|                                  |          |                                  |          |          |
|----------------------------------|----------|----------------------------------|----------|----------|
| <b>Sunchatawirul et al, 2012</b> | Weak     | Observational<br>Cross-sectional | Moderate | Moderate |
| <b>Zona et al, 2012</b>          | Weak     | Observational<br>Case-control    | Moderate | Moderate |
| <b>Guaraldi et al, 2012</b>      | Weak     | Observational<br>Cross-sectional | Strong   | Moderate |
| <b>De Ryck et al, 2013</b>       | Weak     | Observational<br>Cross-sectional | Moderate | Moderate |
| <b>Pérez et al, 2013</b>         | Weak     | Observational<br>Cross-sectional | Moderate | Moderate |
| <b>Pepe et al, 2014</b>          | Weak     | Observational<br>Cross-sectional | Moderate | Moderate |
| <b>Bhatia et al, 2015</b>        | Weak     | Observational<br>Cross-sectional | Weak     | Low      |
| <b>Pathak et al, 2015</b>        | Weak     | Observational<br>Longitudinal    | Moderate | Moderate |
| <b>Rochira et al, 2015</b>       | Weak     | Observational<br>Cross-sectional | Strong   | Moderate |
| <b>Gomes et al, 2016</b>         | Weak     | Observational<br>Cross-sectional | Weak     | Low      |
| <b>Santi et al, 2016</b>         | Weak     | Observational<br>Cross-sectional | Strong   | Moderate |
| <b>Bajaj et al, 2017</b>         | Weak     | Observational<br>Case-control    | Weak     | Low      |
| <b>Dutta et al, 2017</b>         | Weak     | Observational<br>Cross-sectional | Moderate | Moderate |
| <b>Price et al, 2019</b>         | Weak     | Observational<br>Cross-sectional | Strong   | Moderate |
| <b>Bajaj et al, 2020</b>         | Weak     | Observational<br>Case-control    | Moderate | Moderate |
| <b>Pezzaoli et al, 2020</b>      | Weak     | Observational<br>Cross-sectional | Moderate | Moderate |
| <b>de Vincentis et al, 2021</b>  | Weak     | Observational<br>Cross-sectional | Strong   | Moderate |
| <b>Postel et al, 2021</b>        | Moderate | Observational<br>Cross-sectional | Weak     | Low      |
| <b>Quiros-Roldan et al, 2021</b> | Weak     | Observational<br>Cross-sectional | Moderate | Moderate |
| <b>Pilatz et al, 2021</b>        | Weak     | Observational<br>Longitudinal    | Moderate | Moderate |

**Supplementary Table S1.** Quality assessment of the clinical studies included in the meta-analysis

A

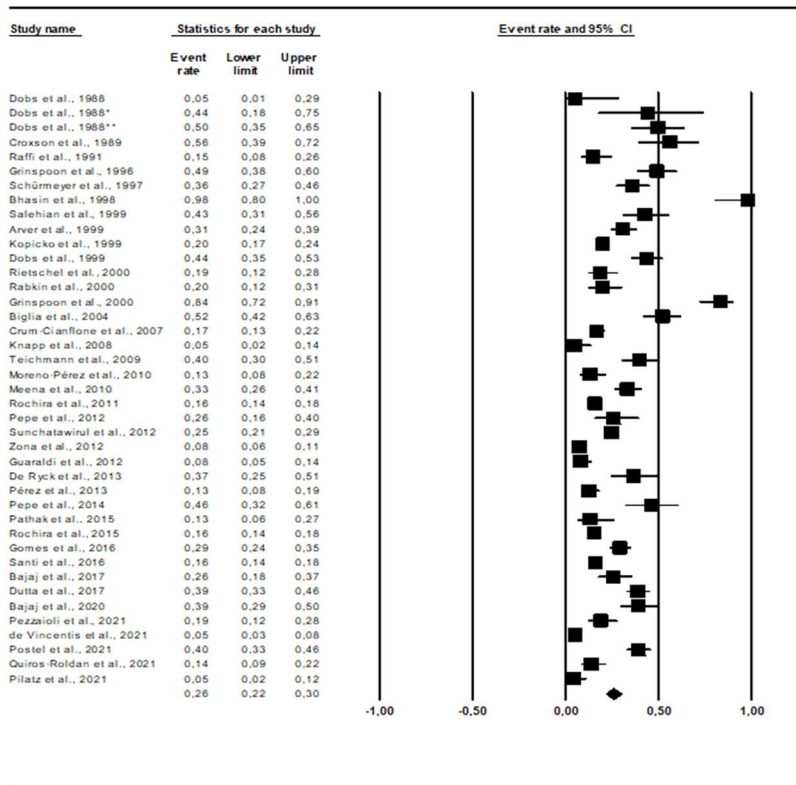

Panel A

B

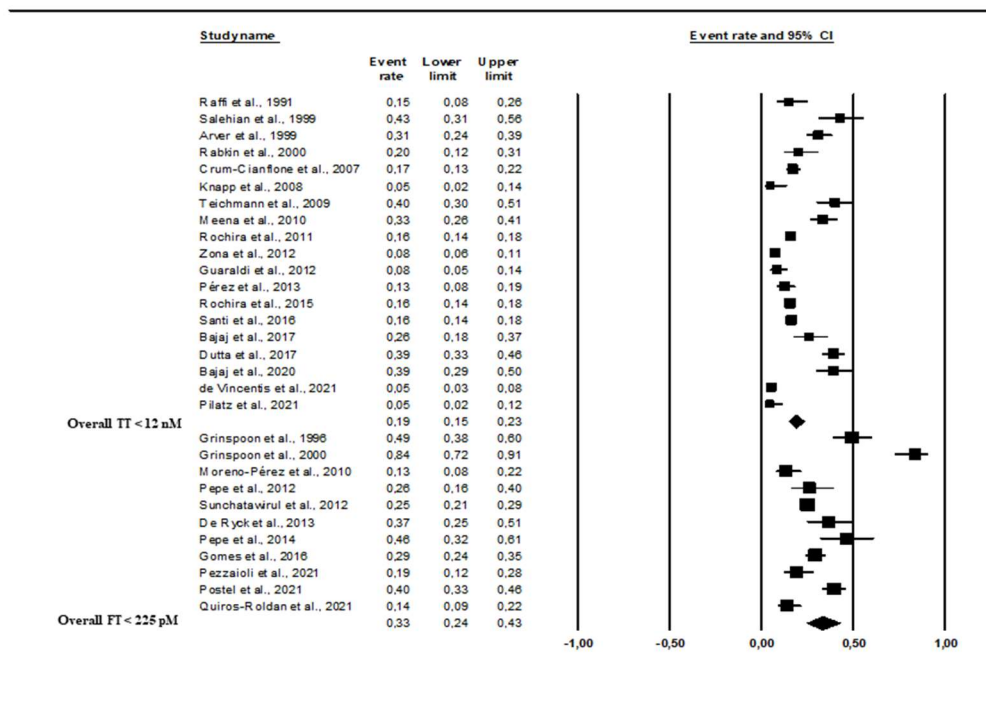

Panel B

Supplementary Figure S1.( Panel A Panel B)

**A**

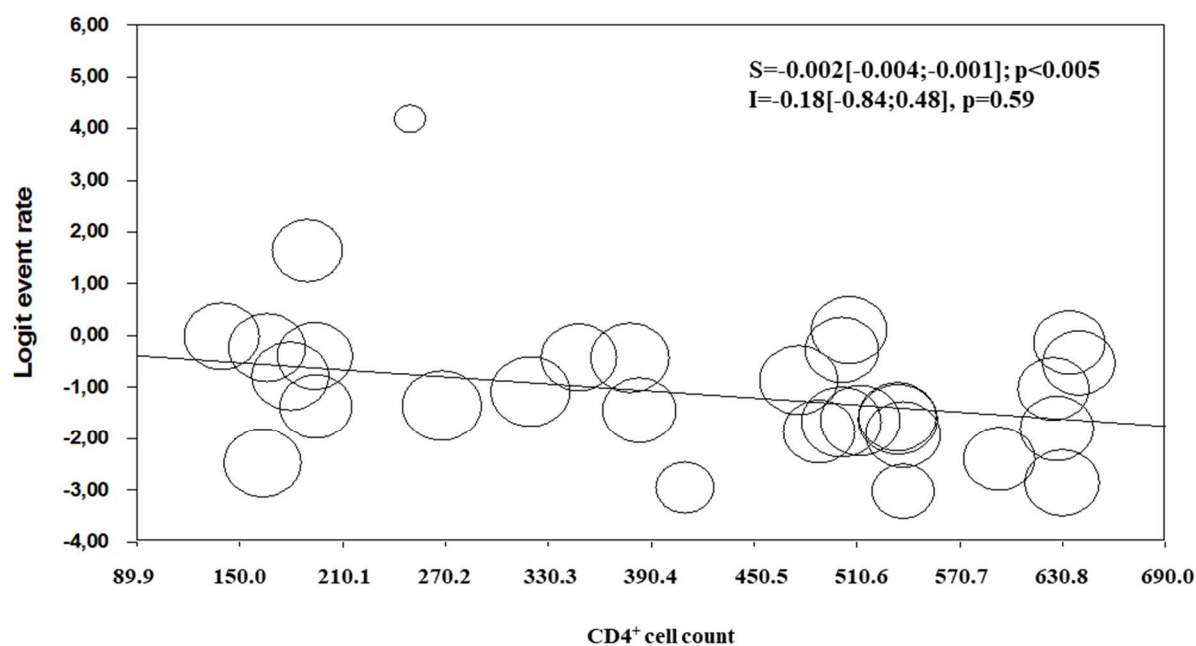

**Panel A**

**B**

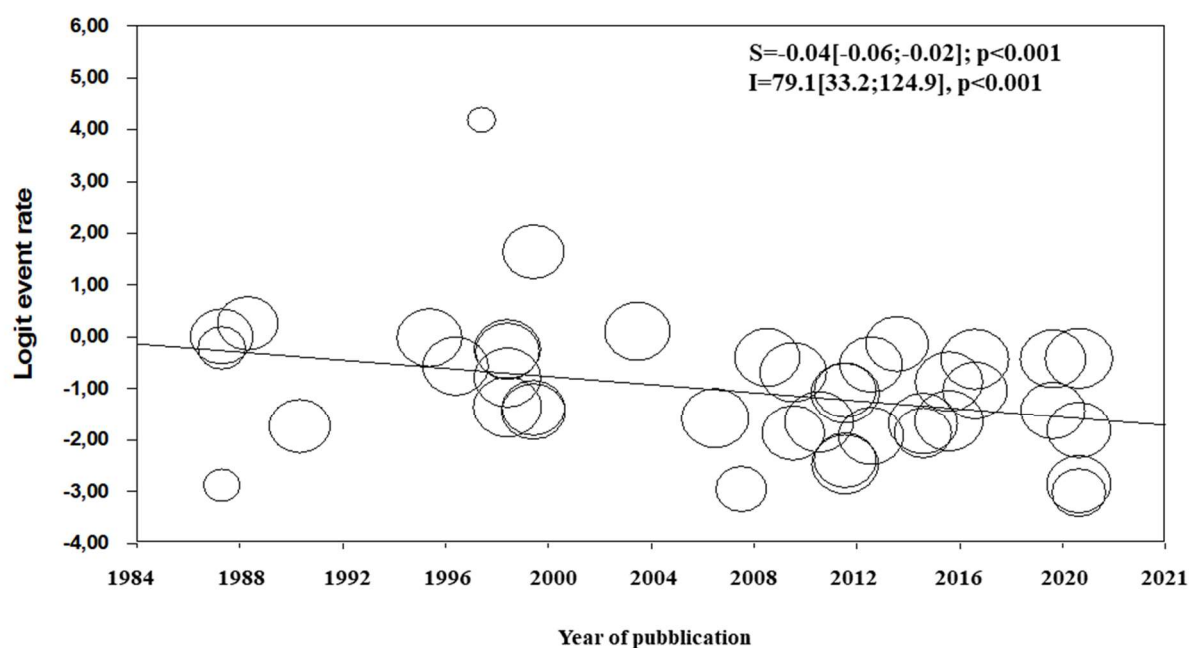

**Panel B**

**Supplementary Figure S2.( Panel A Panel B)**

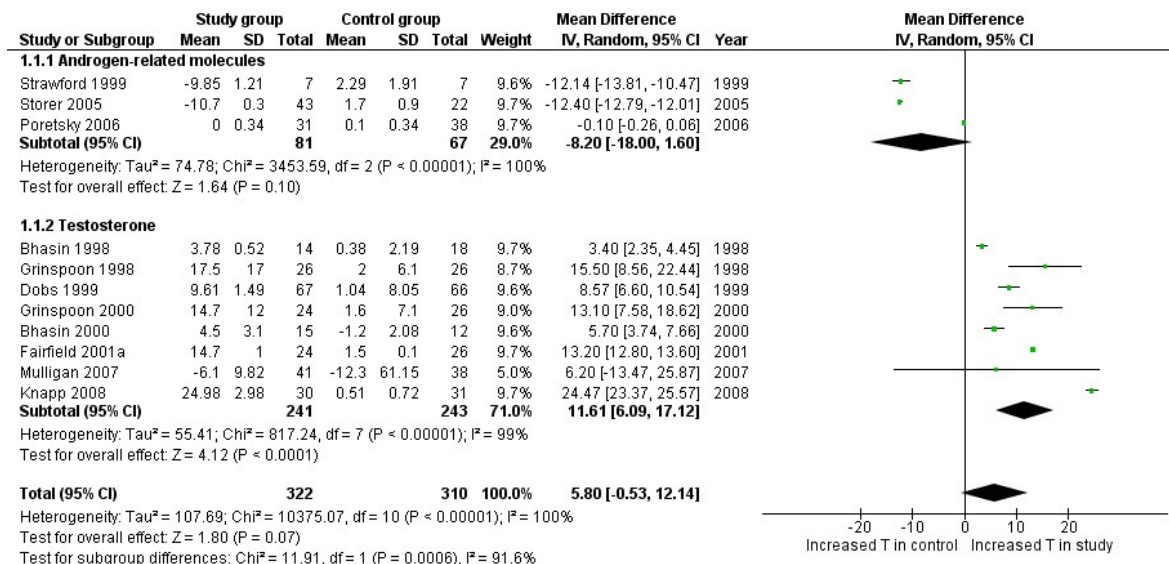

Panel A

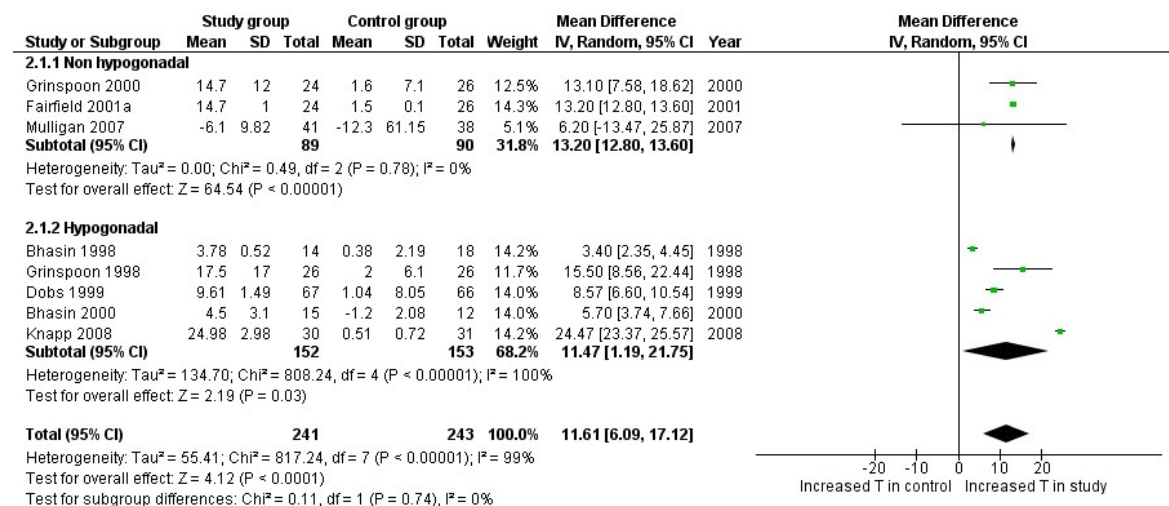

Panel B

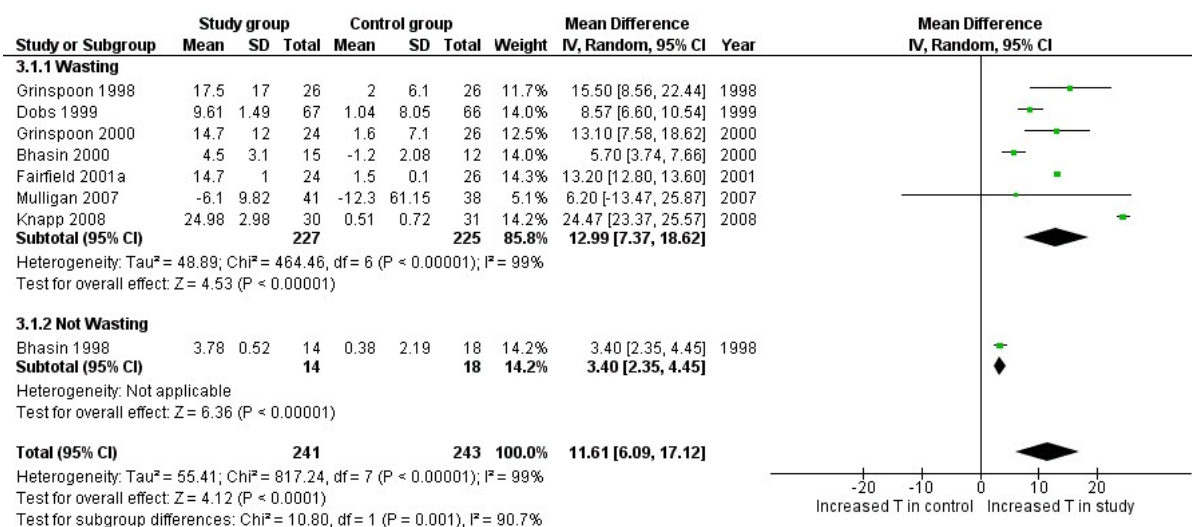

Panel C

Supplementary Figure S3.( Panel A Panel B Panel C)

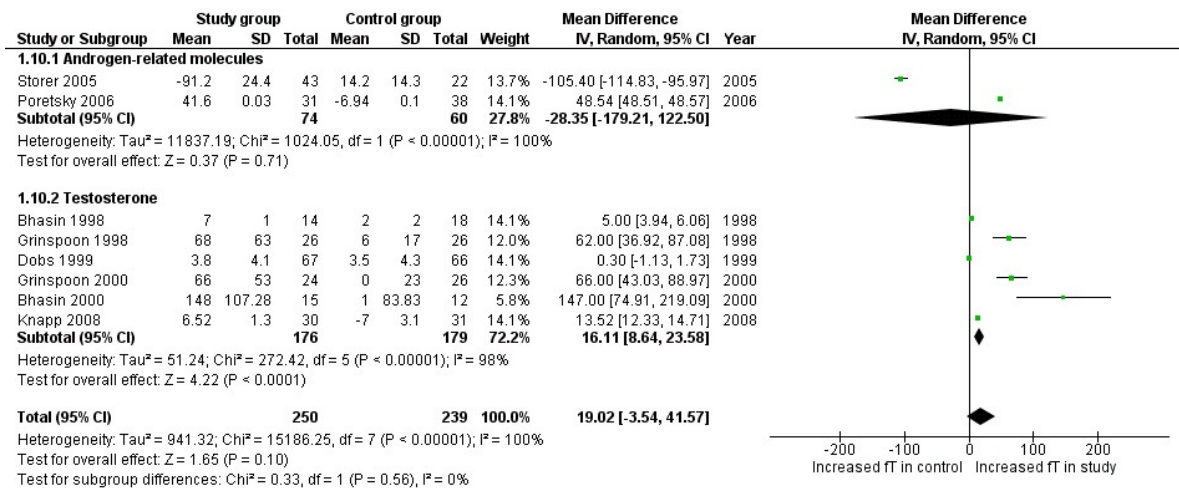

Supplementary Figure 4

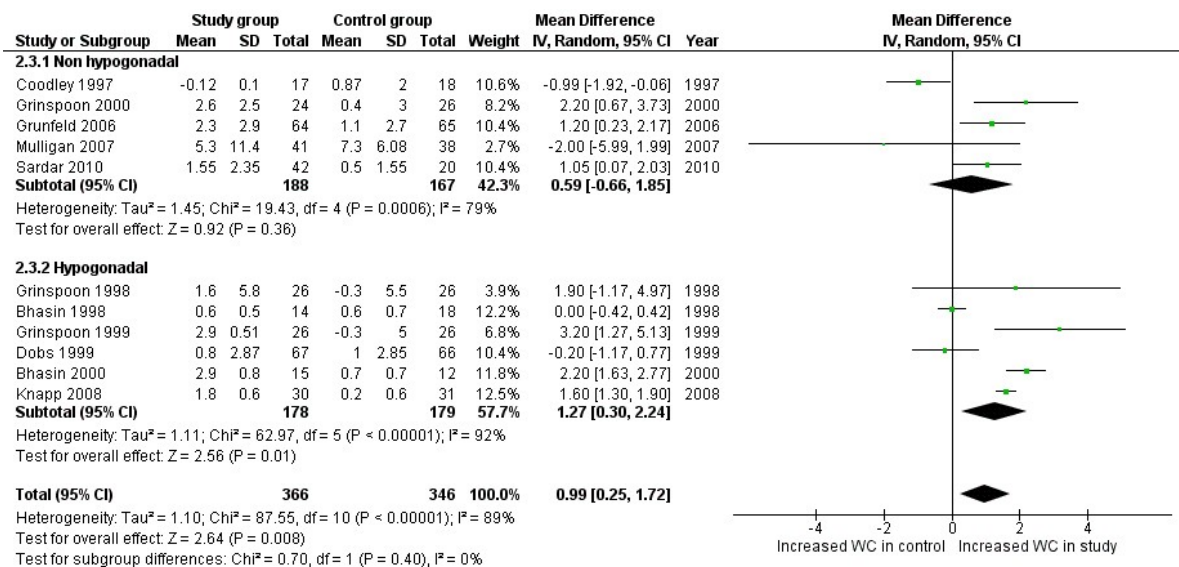

Panel A

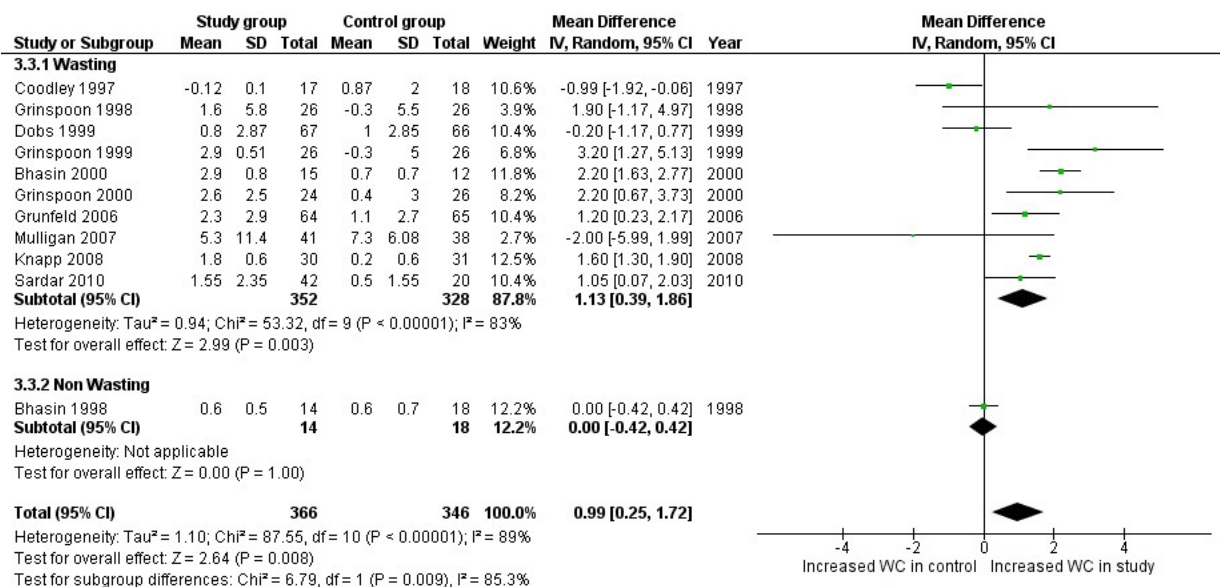

Panel B

Supplementary Figure S5.( Panel A Panel B)

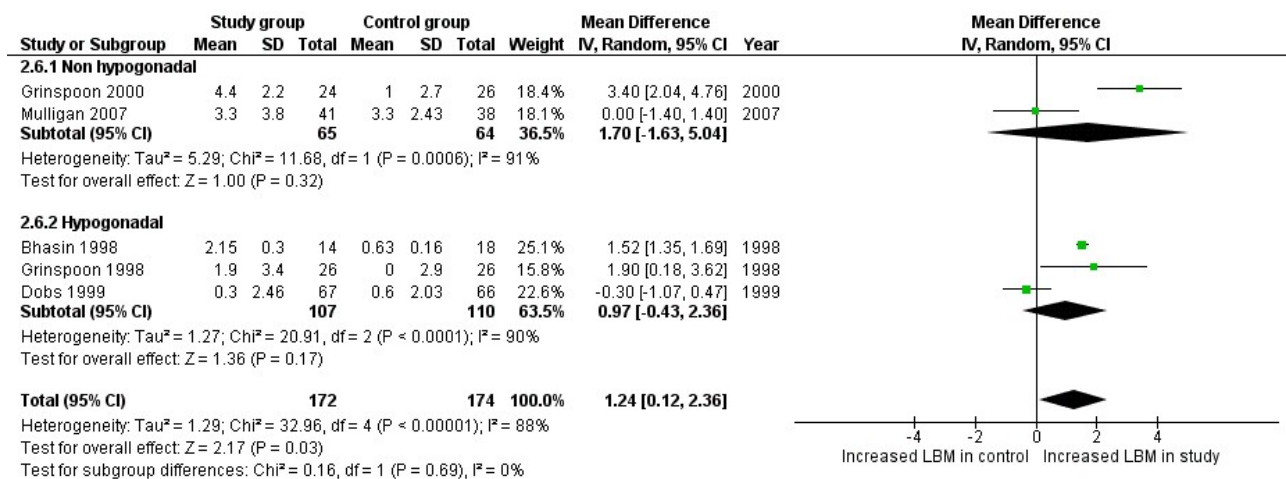

Panel A

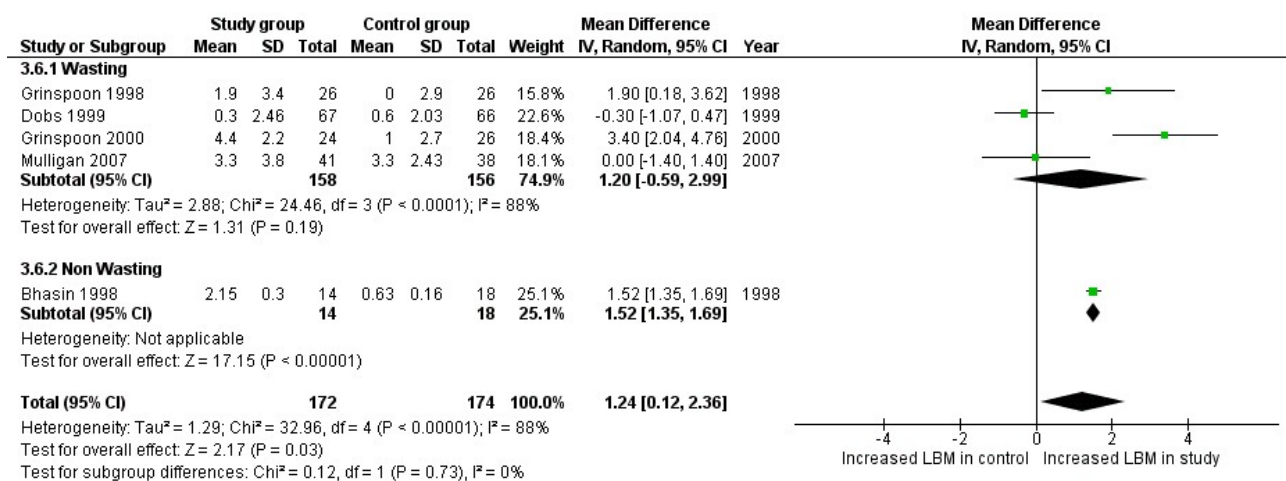

Panel B

Supplementary Figure S6.( Panel A Panel B)



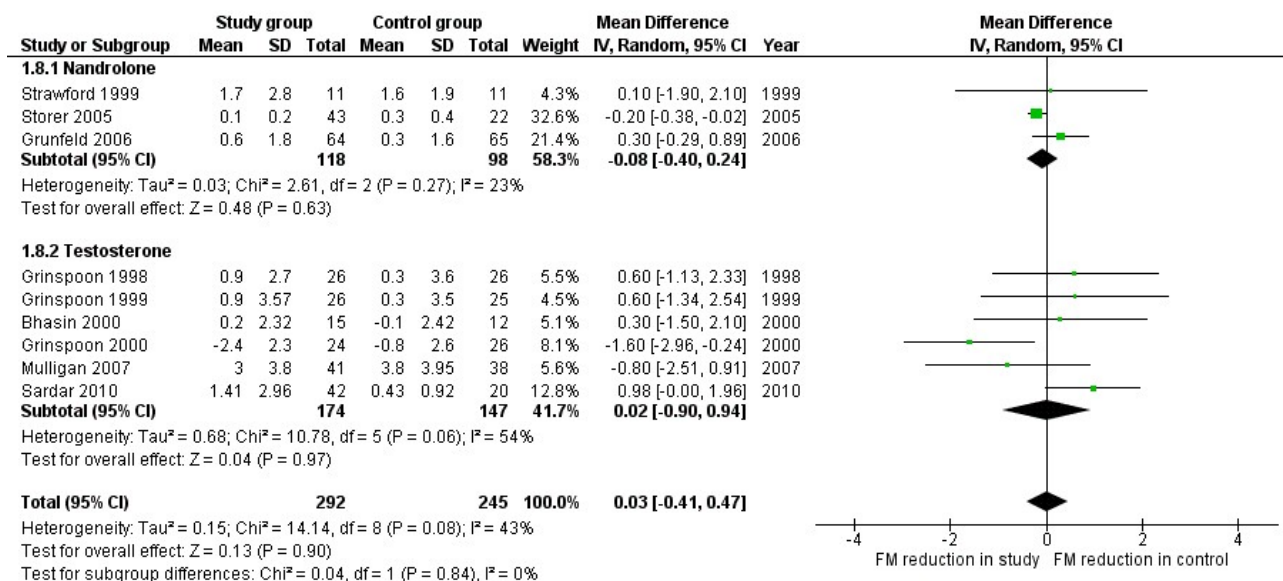

Panel A

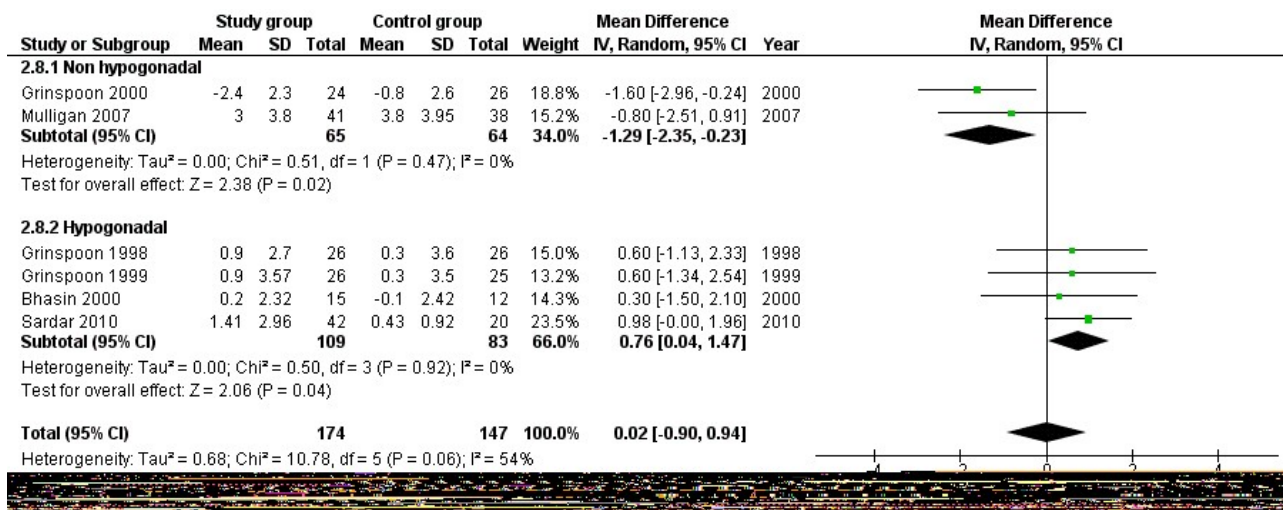

Panel B

Supplementary Figure S7.( Panel A Panel B)
